# Supplementary material for: Correlation between hydrogen yield and product distribution in algae conversion through an isopropanol/water system
Source: Royal Society of Chemistry journal article supplement (doi:10.1039/c8ra07090c), 2018-01-01
Supplement: c8ra07090c1.pdf [file c8ra07090c1.pdf]

**Correlation between hydrogen yield and product distribution in algae  
conversion through isopropanol/water system**

Chunze Liu, Liping Kong, Anaerguli Wufuer, Yuanyuan Wang\*, Liyi Dai

College of Chemistry and Molecular Engineering, East China Normal University, 500 Dongchuan

Road, Shanghai 200241, China

\*Corresponding author.

E-mail address: [ecnu\\_yywang@163.com](mailto:ecnu_yywang@163.com)

Tel.: (86) 021-54340133

Fax: (86) 021-54340133

**Table S1.** Elemental analysis and HHV of bio-oil by different isopropanol/water ratio

| Ratio of i-PrOH <sup>a</sup><br>to water | C/wt% | H/wt% | N/wt% | O/wt% | HHV/ MJ·Kg <sup>-1</sup> |
|------------------------------------------|-------|-------|-------|-------|--------------------------|
| 10: 0                                    | 69.15 | 9.28  | 7.68  | 13.89 | 33.32                    |
| 9: 1                                     | 69.20 | 9.38  | 7.41  | 14.01 | 33.50                    |
| 8: 2                                     | 67.82 | 9.30  | 7.00  | 15.88 | 32.70                    |
| 7: 3                                     | 69.12 | 9.36  | 6.86  | 14.66 | 33.43                    |
| 6: 4                                     | 69.69 | 8.98  | 6.87  | 14.46 | 33.11                    |
| 5: 5                                     | 68.99 | 9.01  | 6.24  | 15.75 | 32.81                    |
| 4: 6                                     | 71.12 | 9.42  | 5.65  | 13.81 | 34.50                    |
| 3: 7                                     | 69.27 | 9.52  | 5.48  | 15.73 | 33.75                    |
| 2: 8                                     | 68.41 | 9.77  | 5.36  | 16.46 | 33.72                    |
| 1: 9                                     | 65.75 | 9.71  | 6.28  | 18.25 | 32.32                    |
| 0: 10                                    | 67.62 | 9.74  | 6.72  | 15.92 | 33.29                    |

a: isopropanol

**Table S2.** 30 main compounds in isopropanol bio-oil

| Retention<br>time in<br>GC(min) | Area%                            | Compound |
|---------------------------------|----------------------------------|----------|
| 11.10                           | Cyclopentanol, 2-chloro-, trans- | 2.15     |
| 15.51                           | 2,5-Pyrrolidinedione, 1-methyl-  | 4.28     |
| 16.00                           | p-Cresol                         | 6.96     |
| 16.43                           | Phenylethyl Alcohol              | 1.85     |

|       |                                                                 |       |
|-------|-----------------------------------------------------------------|-------|
| 16.61 | 4-Methylcyclohexylamine                                         | 0.99  |
| 17.15 | 2,5-Pyrrolidinedione, 1-ethyl-                                  | 1.15  |
| 18.97 | Phenol, 4-ethyl-                                                | 1.59  |
| 19.14 | Cholestan-22(26)-epoxy-3.beta.-ol acetate                       | 1.25  |
| 19.30 | .alpha.-Methyl-.alpha.-propylsuccinimide                        | 1.29  |
| 19.70 | 2H-Azepin-2-one, hexahydro-1-methyl-                            | 1.01  |
| 20.75 | 2,5-Pyrrolidinedione, 1-ethyl-                                  | 1.11  |
| 21.42 | Caprolactam                                                     | 1.40  |
| 22.86 | Indole                                                          | 2.52  |
| 25.59 | 2,5-Pyrrolidinedione, 1-butyl-                                  | 2.63  |
| 25.83 | 1H-Indole, 3-methyl-                                            | 2.11  |
| 34.98 | Heptadecane                                                     | 3.09  |
| 37.30 | 2-Tetradecene, (E)-                                             | 1.19  |
| 38.48 | 2-Hexadecene, 3,7,11,15-tetramethyl-, [R-[R*,R*-(E)]]-          | 6.93  |
| 38.92 | 4-Fluoroveratrole                                               | 1.01  |
| 41.48 | Pyrrolo[1,2-a]pyrazine-1,4-dione, hexahydro-3-(2-methylpropyl)- | 3.33  |
| 42.13 | n-Hexadecanoic acid                                             | 22.17 |
| 43.16 | Isopropyl palmitate                                             | 3.12  |
| 46.05 | Octadec-9-enoic acid                                            | 5.70  |
| 46.44 | Octadecanoic acid                                               | 1.82  |
| 46.73 | Hexadecanamide                                                  | 2.39  |
| 47.44 | N-Methyldodecanamide                                            | 1.95  |
| 48.33 | Octanamide, N,N-dimethyl-                                       | 1.07  |
| 51.17 | Glutaric acid, 3-methylbutyl propyl ester                       | 1.07  |
| 53.24 | 3,6,9,12-Tetraoxatetradecane-1,14-diylbis(2-methylbutanoate)    | 1.44  |

|       |                                    |      |
|-------|------------------------------------|------|
| 54.61 | Octadecanoic acid, DMOX derivative | 0.95 |
|-------|------------------------------------|------|

**Table S3.** 30 main compounds in bio-oil in water system

| Retention<br>time in<br>GC(min) | Area%                                                  | Compound |
|---------------------------------|--------------------------------------------------------|----------|
| 3.68                            | 2- Bromopropionic acid, heptyl ester                   | 1.67     |
| 15.53                           | 3,4-Methylpropylsuccinimide                            | 5.76     |
| 15.91                           | p-Cresol                                               | 4.07     |
| 16.03                           | 1-Ethyl-2-pyrrolidinone                                | 3.54     |
| 16.61                           | Phenylethyl Alcohol                                    | 3.38     |
| 17.16                           | 2,5-Pyrrolidinedione, 1-ethyl-                         | 2.20     |
| 18.98                           | Phenol, 4-ethyl-                                       | 2.24     |
| 19.24                           | Nanofin                                                | 1.26     |
| 20.88                           | 2-Pyrrolidinone, 1-butyl-                              | 1.19     |
| 22.00                           | Nimorazole                                             | 1.21     |
| 22.90                           | Indole                                                 | 1.38     |
| 24.48                           | Piperidine, 1-methyl-                                  | 2.89     |
| 25.59                           | Benzoxazole, 2-[2-(4-morpholy)ethyl]thio-              | 2.33     |
| 25.84                           | 1H-Indole, 3-methyl-                                   | 2.44     |
| 28.60                           | Benzeneethanol, 4-hydroxy-                             | 1.29     |
| 28.80                           | Benzenamine, N-(1-methyl-2-propynyl)-                  | 1.31     |
| 34.97                           | Heptadecane                                            | 3.18     |
| 36.18                           | 2-Sec-Butylcyclohexanone                               | 1.14     |
| 38.18                           | 1-Pentadecene                                          | 1.26     |
| 38.46                           | 2-Hexadecene, 3,7,11,15-tetramethyl-, [R-[R*,R*-(E)]]- | 7.83     |

|       |                                                           |       |
|-------|-----------------------------------------------------------|-------|
| 41.45 | 2-Hydroxy-3,5,5-trimethyl-cyclohex-2-enone                | 1.74  |
| 42.05 | n-Hexadecanoic acid                                       | 17.48 |
| 43.15 | Isopropyl palmitate                                       | 1.75  |
| 46.04 | Oleic Acid                                                | 7.33  |
| 46.41 | Octadecanoic acid                                         | 2.41  |
| 46.72 | Hexadecanamide                                            | 1.06  |
| 47.43 | N-Methyldodecanamide                                      | 1.73  |
| 48.32 | Octanamide, N,N-dimethyl-                                 | 1.72  |
| 51.17 | Octadecanamide, N-butyl-                                  | 1.20  |
| 53.24 | 3-(3,4-Dimethyl-6-Phenylcyclohex-3-enyl)prop-2-enoic acid | 1.22  |

**Table S4.** Elemental analysis and HHV of bio-oil by different isopropanol/water ratio with formic acid

| Ratio of i-PrOH <sup>a</sup><br>to water | C/wt% | H/wt% | N/wt% | O/wt% | HHV/MJ·Kg <sup>-1</sup> |
|------------------------------------------|-------|-------|-------|-------|-------------------------|
| 10: 0                                    | 72.75 | 10.00 | 5.92  | 11.33 | 36.21                   |
| 9: 1                                     | 69.28 | 9.50  | 7.45  | 13.77 | 33.73                   |
| 8: 2                                     | 69.09 | 9.03  | 6.27  | 15.61 | 32.89                   |
| 7: 3                                     | 68.92 | 9.01  | 6.36  | 15.71 | 32.77                   |
| 6: 4                                     | 68.11 | 8.99  | 8.02  | 14.88 | 32.36                   |
| 5: 5                                     | 64.73 | 9.55  | 7.56  | 18.15 | 31.58                   |
| 4: 6                                     | 67.69 | 9.22  | 6.87  | 16.22 | 32.51                   |
| 3: 7                                     | 69.51 | 8.99  | 6.72  | 14.78 | 33.04                   |
| 2: 8                                     | 65.86 | 9.56  | 7.59  | 16.99 | 32.14                   |

|       |       |      |      |       |       |
|-------|-------|------|------|-------|-------|
| 1: 9  | 67.54 | 9.87 | 7.02 | 15.57 | 33.45 |
| 0: 10 | 66.21 | 9.77 | 7.17 | 16.85 | 32.65 |

a: isopropanol

**Table S5.** 30 main compounds in bio-oil in isopropanol system with formic acid

| Retention<br>time in<br>GC(min) | Area%                                                                          | Compound |
|---------------------------------|--------------------------------------------------------------------------------|----------|
| 14.16                           | 2-Nonanone                                                                     | 4.94     |
| 15.62                           | p-Cresol                                                                       | 1.72     |
| 16.44                           | 3-Heptene, 2,2,3,5,6-pentamethyl-                                              | 2.19     |
| 17.32                           | 1,7-Dimethyl-4-(1-methylethyl)cyclodecane                                      | 3.94     |
| 17.49                           | Cyclohexane, 1,4-dimethyl-2-(2-methylpropyl)-,<br>(1.alpha.,2.beta.,4.alpha.)- | 2.22     |
| 17.62                           | 1-Undecene, 8-methyl-                                                          | 1.67     |
| 17.90                           | 1,3-Dimethyl-(3,7-dimethyloctyl)cyclohexane                                    | 4.60     |
| 18.18                           | Cyclohexane, 1,4-dimethyl-2-(2-methylpropyl)-,<br>(1.alpha.,2.beta.,4.alpha.)- | 1.60     |
| 20.34                           | 2,5-Pyrrolidinedione, 1-propyl-                                                | 1.64     |
| 20.74                           | Decane, 2-methyl-                                                              | 1.45     |
| 21.02                           | Dodecane, 4,6-dimethyl-                                                        | 3.51     |
| 22.72                           | Dodecane, 2,6,11-trimethyl-                                                    | 2.24     |
| 24.72                           | 3-Eicosene, (E)-                                                               | 1.64     |
| 25.26                           | Cyclododecane                                                                  | 2.78     |
| 25.44                           | Trifluoroacetic acid, pentadecyl ester                                         | 2.79     |

|       |                                                                |      |
|-------|----------------------------------------------------------------|------|
| 25.62 | 4,4-Dimethyl-cyclohex-2-en-1-ol                                | 2.73 |
| 25.93 | Disparlure                                                     | 2.70 |
| 26.05 | Cyclohexane, (1,2-dimethylbutyl)-                              | 1.94 |
| 26.36 | Cyclooctane, tetradecyl-                                       | 7.84 |
| 26.53 | 4,4,7-Trimethyl-oct-5-enal                                     | 2.03 |
| 26.82 | N-(2-Fluorophenyl)-2-sulfanylacetamide                         | 3.10 |
| 27.22 | Cyclohexane, 1,4-dimethyl-2-octadecyl-                         | 1.91 |
| 30.59 | 3-Ethyl-3-methylheptane                                        | 1.74 |
| 31.24 | 5,6,6-Trimethyl-5-(3-oxobut-1-enyl)-1-oxaspiro[2.5]octan-4-one | 1.74 |
| 33.30 | 1,3-Dimethyl-5-n-decylcyclohexane                              | 3.41 |
| 34.98 | Heptadecane                                                    | 2.11 |
| 37.30 | Cyclotetradecane                                               | 1.82 |
| 38.46 | 2-Hexadecene, 3,7,11,15-tetramethyl-, [R-[R*,R*-(E)]]-         | 2.68 |
| 41.96 | n-Hexadecanoic acid                                            | 5.71 |
| 43.16 | i-Propyl 14-methyl-pentadecanoate                              | 2.42 |

**Table S6.** 30 main compounds in bio-oil in water system with formic acid

| Retention time in GC(min) | Area%                                        | Compound |
|---------------------------|----------------------------------------------|----------|
| 3.61                      | 1-Heptene                                    | 1.03     |
| 15.12                     | o-Acetyl-N,o'-carbonyl-tetrahydro-solasodine | 0.81     |
| 15.56                     | .alpha.-Methyl-.alpha.-propylsuccinimide     | 5.18     |
| 16.06                     | p-Cresol                                     | 9.02     |
| 16.52                     | Phenylethyl Alcohol                          | 4.05     |

|       |                                                                         |       |
|-------|-------------------------------------------------------------------------|-------|
| 17.19 | 2,5-Pyrrolidinedione, 1-ethyl-                                          | 2.87  |
| 19.13 | Phenol, 4-ethyl-                                                        | 2.34  |
| 19.26 | Piperidine, 3-methyl-                                                   | 1.45  |
| 20.89 | 2-Pyrrolidinone, 1-butyl-                                               | 0.95  |
| 22.02 | Nimorazole                                                              | 1.54  |
| 22.91 | Indole                                                                  | 1.54  |
| 24.50 | 2-Pyrrolidinone, 1-butyl-                                               | 1.94  |
| 25.61 | Benzoxazole, 2-[2-(4-morpholyl)ethyl]thio-                              | 2.72  |
| 25.85 | 1H-Indole, 6-methyl-                                                    | 2.44  |
| 28.60 | Benzeneethanol, 3-hydroxy-                                              | 1.09  |
| 28.80 | Benzonitrile, 2,4,6-trimethyl-                                          | 0.99  |
| 34.97 | Heptadecane                                                             | 2.59  |
| 36.19 | (1-Ethyl-2-pyrrolidinyl)methanol                                        | 1.48  |
| 36.48 | 1-Phenethyl-pyrrolidin-2,4-dione                                        | 1.52  |
| 38.80 | 2-Hexadecene, 3,7,11,15-tetramethyl-, [R-[R*,R*-(E)]]-                  | 8.43  |
| 41.02 | 5,10-Diethoxy-2,3,7,8-tetrahydro-1H,6H-dipyrrolo[1,2-a:1',2'-d]pyrazine | 0.88  |
| 41.46 | ((5R,8R,8S)-5-Propyloctahydroindolizin-8-yl)methanol                    | 2.30  |
| 42.10 | n-Hexadecanoic acid                                                     | 18.93 |
| 42.44 | Butalbital                                                              | 1.16  |
| 43.14 | i-Propyl 14-methyl-pentadecanoate                                       | 0.82  |
| 46.04 | 9-Octadecenoic acid, (E)-                                               | 6.11  |
| 46.44 | Octadecanoic acid                                                       | 3.10  |
| 46.74 | Hexadecanamide                                                          | 1.18  |
| 47.44 | N-Methyldodecanamide                                                    | 1.44  |
| 48.32 | Undecanone, 2-methyl oxime                                              | 1.33  |

---
